# Supplementary material for: Factor Structure and Measurement Invariance of the MHC-SF in the USA
Source: Atypon-hosted journal article supplement (doi:10.1027/1015-5759/a000425), 2017-08-16
Supplement: 1015-5759_a000425_esm1.pdf [file 1015-5759_a000425_esm1.pdf]

**Supplementary Material for “Factor Structure and Measurement Invariance of the  
MHC-SF in United States”**

**Table 5**  
*Confirmatory and Exploratory Factor Analyses with MLR*

| Model         | $\chi^2$  | df | CFI   | TLI   | SRMR  | AIC        | BIC        | RMSEA | 90% CI for RMSEA |       |
|---------------|-----------|----|-------|-------|-------|------------|------------|-------|------------------|-------|
|               |           |    |       |       |       |            |            |       | LL               | UL    |
| 1-factor      | 19460.150 | 77 | 0.838 | 0.808 | 0.064 | 936321.922 | 936660.952 | 0.103 | 0.102            | 0.104 |
| 2-factor ESEM | 3901.691  | 52 | 0.968 | 0.944 | 0.021 | 914163.704 | 914704.537 | 0.056 | 0.054            | 0.057 |
| 2-factor CFA  | 10606.570 | 74 | 0.912 | 0.892 | 0.053 | 923403.571 | 923766.817 | 0.078 | 0.076            | 0.079 |

*Note.* LL = lower limit; UL = upper limit. All  $\chi^2$  estimates are significant at  $p < .001$ .

Table 6  
*Standardized Factor Loading for the Three-Factor ESEM  
 Model Using Target Rotation*

|               | Emotional        | Social           | Psychological    |
|---------------|------------------|------------------|------------------|
| Emotional     |                  |                  |                  |
| Item 1        | <b>0.963</b> *** | -0.007           | -0.124***        |
| Item 2        | <b>0.641</b> *** | 0.013*           | 0.188***         |
| Item 3        | <b>0.714</b> *** | 0.104***         | 0.032***         |
| Social        |                  |                  |                  |
| Item 4        | 0.119***         | 0.232***         | <b>0.436</b> *** |
| Item 5        | 0.210***         | <b>0.327</b> *** | 0.240***         |
| Item 6        | -0.065***        | <b>0.931</b> *** | -0.079***        |
| Item 7        | 0.026**          | <b>0.718</b> *** | -0.042***        |
| Item 8        | -0.083***        | <b>0.823</b> *** | -0.072***        |
| Psychological |                  |                  |                  |
| Item 9        | 0.205***         | 0.063***         | <b>0.537</b> *** |
| Item 10       | 0.083***         | 0.069***         | <b>0.555</b> *** |
| Item 11       | 0.210***         | 0.105***         | <b>0.471</b> *** |
| Item 12       | -0.120***        | 0.048***         | <b>0.771</b> *** |
| Item 13       | -0.054***        | -0.029***        | <b>0.783</b> *** |
| Item 14       | 0.006            | 0.063***         | <b>0.748</b> *** |

*Note.* Loadings that are larger than .30 are shown in boldface.

\*  $p < .05$ ; \*\*  $p < .01$ ; \*\*\*  $p < .01$

Table 7  
*Standardized Factor Loading for the Three-Factor ESEM  
 Model Using CF-Facparsim Rotation*

|               | Emotional                   | Social                      | Psychological               |
|---------------|-----------------------------|-----------------------------|-----------------------------|
| Emotional     |                             |                             |                             |
| Item 1        | <b>0.849</b> <sup>***</sup> | 0.075 <sup>***</sup>        | -0.027 <sup>***</sup>       |
| Item 2        | <b>0.629</b> <sup>***</sup> | 0.096 <sup>***</sup>        | 0.203 <sup>***</sup>        |
| Item 3        | <b>0.672</b> <sup>***</sup> | 0.169 <sup>***</sup>        | 0.088 <sup>***</sup>        |
| Social        |                             |                             |                             |
| Item 4        | 0.237 <sup>***</sup>        | 0.273 <sup>***</sup>        | <b>0.378</b> <sup>***</sup> |
| Item 5        | 0.288 <sup>***</sup>        | <b>0.346</b> <sup>***</sup> | 0.234 <sup>***</sup>        |
| Item 6        | 0.041 <sup>***</sup>        | <b>0.833</b> <sup>***</sup> | -0.004                      |
| Item 7        | 0.105 <sup>***</sup>        | <b>0.652</b> <sup>***</sup> | 0.018 <sup>**</sup>         |
| Item 8        | 0.013 <sup>*</sup>          | <b>0.733</b> <sup>***</sup> | -0.007                      |
| Psychological |                             |                             |                             |
| Item 9        | <b>0.316</b> <sup>***</sup> | 0.139 <sup>***</sup>        | <b>0.455</b> <sup>***</sup> |
| Item 10       | 0.210 <sup>***</sup>        | 0.134 <sup>***</sup>        | <b>0.461</b> <sup>***</sup> |
| Item 11       | <b>0.312</b> <sup>***</sup> | 0.171 <sup>***</sup>        | <b>0.405</b> <sup>***</sup> |
| Item 12       | 0.071 <sup>***</sup>        | 0.120 <sup>***</sup>        | <b>0.619</b> <sup>***</sup> |
| Item 13       | 0.124 <sup>***</sup>        | 0.058 <sup>***</sup>        | <b>0.628</b> <sup>***</sup> |
| Item 14       | 0.183 <sup>***</sup>        | 0.144 <sup>***</sup>        | <b>0.611</b> <sup>***</sup> |

*Note.* Loadings that are larger than .30 are shown in boldface.

\*  $p < .05$ ; \*\*  $p < .01$ ; \*\*\*  $p < .01$

Table 8  
*Standardized Factor Loading for the Three-Factor ESEM  
 Models Using Geomin Rotation ( $\epsilon = .5$ )*

|               | Emotional        | Social           | Psychological    |
|---------------|------------------|------------------|------------------|
| Emotional     |                  |                  |                  |
| Item 1        | <b>0.863</b> *** | 0.051***         | -0.031***        |
| Item 2        | <b>0.632</b> *** | 0.072***         | 0.207***         |
| Item 3        | <b>0.679</b> *** | 0.146***         | 0.090***         |
| Social        |                  |                  |                  |
| Item 4        | 0.227***         | 0.252***         | <b>0.392</b> *** |
| Item 5        | 0.284***         | <b>0.329</b> *** | 0.244***         |
| Item 6        | 0.039***         | <b>0.828</b> *** | 0.009            |
| Item 7        | 0.104***         | <b>0.645</b> *** | 0.028***         |
| Item 8        | 0.011            | <b>0.730</b> *** | 0.004            |
| Psychological |                  |                  |                  |
| Item 9        | <b>0.306</b> *** | 0.114***         | <b>0.469</b> *** |
| Item 10       | 0.198***         | 0.113***         | <b>0.476</b> *** |
| Item 11       | <b>0.303</b> *** | 0.148***         | <b>0.418</b> *** |
| Item 12       | 0.052***         | 0.097***         | <b>0.639</b> *** |
| Item 13       | 0.105***         | 0.034***         | <b>0.647</b> *** |
| Item 14       | 0.165***         | 0.118***         | <b>0.630</b> *** |

*Note.* Loadings that are larger than .30 are shown in boldface.  
 \*  $p < .05$ ; \*\*  $p < .01$ ; \*\*\*  $p < .01$

Table 9  
*ESEM Factor Correlations for Different Rotation Criteria*

|                        | Emotional | Social |
|------------------------|-----------|--------|
| Geomin $\epsilon = .5$ |           |        |
| Emotional              | -         |        |
| Social                 | 0.427     | -      |
| Psychological          | 0.560     | 0.381  |
| Target rotation        |           |        |
| Emotional              | -         |        |
| Social                 | 0.620     | -      |
| Psychological          | 0.759     | 0.609  |
| CF-facparsim           |           |        |
| Emotional              | -         |        |
| Social                 | 0.406     | -      |
| Psychological          | 0.523     | 0.358  |
| CF-varimax             |           |        |
| Emotional              | -         |        |
| Social                 | 0.498     | -      |
| Psychological          | 0.629     | 0.445  |

*Note.* All estimates are significant at  $p < .001$ .

Table 10  
Samples sizes in the measurement invariance testing

|                    | Total sample size | Group         | Group size |
|--------------------|-------------------|---------------|------------|
| Gender             | 23622             | Female        | 14946      |
|                    |                   | Male          | 8676       |
| Nationality        | 23657             | USA           | 22039      |
|                    |                   | International | 1618       |
| Sexual orientation | 23674             | Heterosexual  | 21866      |
|                    |                   | Other         | 1808       |

## Appendix 1. The MHC-SF

The following questions are about how you have been feeling during the past month. Place a check mark in the box that best represents how often you have experienced or felt the following:

| During the past month, how often did you feel ...                                   | NEVER | ONCE OR TWICE | ABOUT ONCE A WEEK | ABOUT 2 OR 3 TIMES A WEEK | ALMOST EVERY DAY | EVERY DAY |
|-------------------------------------------------------------------------------------|-------|---------------|-------------------|---------------------------|------------------|-----------|
| 1. happy                                                                            |       |               |                   |                           |                  |           |
| 2. interested in life                                                               |       |               |                   |                           |                  |           |
| 3. satisfied                                                                        |       |               |                   |                           |                  |           |
| 4. that you had something important to contribute to society                        |       |               |                   |                           |                  |           |
| 5. that you belonged to a community (like a social group, or your neighborhood)     |       |               |                   |                           |                  |           |
| 6. that our society is becoming a better place for people like you                  |       |               |                   |                           |                  |           |
| 7. that people are basically good                                                   |       |               |                   |                           |                  |           |
| 8. that the way our society works makes sense to you                                |       |               |                   |                           |                  |           |
| 9. that you liked most parts of your personality                                    |       |               |                   |                           |                  |           |
| 10. good at managing the responsibilities of your daily life                        |       |               |                   |                           |                  |           |
| 11. that you had warm and trusting relationships with others                        |       |               |                   |                           |                  |           |
| 12. that you had experiences that challenged you to grow and become a better person |       |               |                   |                           |                  |           |
| 13. confident to think or express your own ideas and opinions                       |       |               |                   |                           |                  |           |
| 14. that your life has a sense of direction or meaning to it                        |       |               |                   |                           |                  |           |
